# Supplementary material
Source: MDPI journal article supplement (https://www.mdpi.com/2075-5309/8/4/55)
Supplement: s1 [file s1]

## Sheet: Literature
Author	Publication year	Title	Published	Pages	Country	Institution	Topic category	Keywords	Short description	Citations	Maturity category	Review	Time perspective (days)	Roof area (m2)
Langston	2015	Green roof evaluation: A holistic 'Long life, loose fit, low energy' approach	Construction Economics and Building	19	Australia	Bond University	Economy	Intensive green roof, evaluation, sustainable prosperity, housing, Australia.	The article discusses the cost-benefit balance of a green roof on a detached residential building in Queensland, Australia. It is found that, if built right, green roofs can be the least costly option in a 25-year perspective.	5	0
Claus & Rousseau	2012	Public versus private incentives to invest in green roofs: A cost benefit analysis for Flanders	Urban Forestry and Urban Greening	9	Belgium	HU Brussel	Policy	Policy evaluation Subsidy Vegetated roof	A case study is used to show that the installation of a green roof is socially desirable, but private incentives to invest are insufficient. Subsidy policies and governmental actions tend to be fragmented down to the municipality level, and information might be scarce. A more cohesive government policy is desired.	38	0
MacIvor & Lundholm	2011	Performance evaluation of native plants suited to extensive green roof conditions in a maritime climate	Ecological Engineering	11	Canada	York University (Toronto)	MOM	Extensive green roofs Native plants Green roof design Roof cooling Stormwater retention Multifunctionality	Investigates the survival rate and hydrological performacnce of 15 different plant species on a green roof in Canada. The study suggests that native species may perform better than non-natives in a coastal climate.	136	4		183	20.7
Bass	2008	Should you put your energy into green roofs to reduce energy consumption in your building	Journal of Green Building	15	Canada	Universty of Toronto	Energy	(none given)	The article lists and discusses factors in which the green roofs/walls affect a building's energy use. As is typical, the most attention is given to cooling potential.	0	0
Loder	2014	‘There’s a meadow outside my workplace’: A phenomenological exploration of aesthetics and green roofs in Chicago and Toronto	Landscape and Urban Planning	13	Canada	University of Toronto	Aesthetics	Green roofs Aesthetics Health and well-being Toronto Chicago Phenomenology	The article studies the perceptions of green roofs among office workers in Chicago and Toronto. It was found that the respondents' background played a key role in whether they prefered "meadow" or "prarie" green roofs, or whether the latter type brought positive associations.	40	0
Hill et al.	2016	Comparisons of extensive green roof media in Southern Ontario	Ecological Engineering	9	Canada	University of Toronto	Hydrology	Green roofs, Organic matter, Water retention, Compost, Pedotransfer functions, Physicochemical properties	33 roofs from the Southern Ontario region were sampled and analysed in a lab. It was found that the soil conditions in the media remained stable for long-term periods, both with regards to thickness and chemical composition. Samples with low organic matter had typically higher permeability.	4	2
Sims et al.	2016	Retention performance of green roofs in three different climate regions	Journal of Hydrology	10	Canada	University of Western Ontario	Hydrology	Green roof Stormwater management Retention Runoff	The three climate regions mentioned in the title are Ontario (humid continental), Calgary (semi-arid, continental), and Nova Scotia (humid maritime). Drier climates were found to have greater cumulative stormwater retention by percentage. The impact of climate was greatest for medium sized storms. Antecedent moisture conditions (AMC) is proven a relevant indicator of retention performance in any …	7	4		781	60
Liu & Baskaran	2003	Thermal performance of green roofs through field evaluation	First North American Green Roof Infrastructure Conference	10	Canada	National Research Council (Ottawa)	Thermal Insulation	(none given)	A test greenroof is established and temperatures at the roof membrane measured. It is found that the presence of a green roof may greatly reduce temperature fluctuations and subsequently wear of the membrane.	207	5		720	72
Liu & Minor	2005	Performance evaluation of an extensive green roof	SB05 Conference	11	Canada	National Research Council of Canada	Thermal Insulation	(none given)	Two green roofs were examined and compared with regards to thermal performance and annual runoff. The thicker roof (100 mm) had a greater impact on summer thermal flow due to its higher reflectivity, while the thinner roof (75 mm) was more effective in winter, owning to a polystyrene drainage board, as opposed to a semi-rigid polymeric board in the thicker roof.	147	5		400	230
Lundholm et al.	2014	Snow depth and vegetation type affect green roof thermal performance in winter	Energy and Buildings	9	Canada	Saint Mary's University (Halifax)	Thermal Insulation	Plant traits Heat flux Soil temperature Insulation Solar radiation Wind	Green roofs are found to insulate better than conventional roofs. Doubling the substrate thickness had no effect on net heat loss. Snow acts as an "equalizer", lowering the relative benefit of a green roof. Net thermal benefits of green roofs in winter is dependent on a variety of factors.	22	5		1000	216
Bianchini & Hewage	2012	How "green" are the green roofs? Lifecycle analysis of green roof materials	Building and Environment	9	Canada	University of British Columbia	LCA	Green roofs Sustainability Polymers Air pollution Green roof materials	The article descirbes an inventory analysis of green roofs, and life cycle analyses for the most common materials. Regrettably, no calculations are done per square meter of green roof.	141	0
Cubi et al.	2015	Sustainability of rooftop technologies in cold climates	Journal of Industrial Ecology	14	Canada	University of Calgary	LCA	building energy use green roofs industrial ecology life cycle assessment (LCA) solar photovoltaics white roofs	Article comparing the relative ecological merits/benefits of photovoltaic roofs, green roos, and white roofs. Rooftop PV proves to be the highest-performing technology, while green roofs also have positive impacts. White roofs generally do not, in a cold climate.	7	2
Oberndorfer et al.	2007	Green roofs as urban ecosystems: ecological structures, functions, and services	BioScience	11	Canada	Saint Mary's University (Halifax)	LCA	urban ecology, biomimicry, built environments, habitat creation, energy conservation	The article reviews the evidence for the benefits of green roofs and examines the biotic and abiotic components that contribute to overall ecosystem services. It is suggested that future research should assess the efficacy of green roofs compared to other techinogies with similar ends.	802	0	1
Bianchini & Hewage	2012	Probabilistic social cost-benefit analysis for green roofs: A lifecycle approach	Building and Environment	11	Canada	University of British Columbia	Economy	Green roofs Sustainability Net present value Payback Probabilistic analysis Construction and demolition waste	The cost, net present value, and payback time of two types of green roofs (extensive and intensive) are calculated. A probabilistic analysis gives a payback time of 4-14 years, depending on roof type. Green roofs are found to be a low-risk investment. However, this appears to assume that everything goes according to plans...	94	0	1
Teemusk & Mander	2007	Rainwater runoff quantity and quality performance from a greenroof: The effects of short-term events	Ecological Engineering	7	Estonia	University of Tartu	Hydrology	Greenroof, Runoff quality, Stormwater retention, Snowmelt water	The article examines how green roofs affect the quality and quantity of water runoff. They are found to have positive as well as negative effects, although more of the positive ones. Pollutants accumulate in the substrate layer, but are washed out by intense rain.	262	6		334	120
Teemusk & Mander	2009	Greenroof potential to reduce temperature fluctuations of a roof membrane: A case study from Estonia	Building and Environment	8	Estonia	University of Tartu	Thermal Insulation	Bituminous membrane roof Greenroof LWA Sedum spp. Temperature fluctuations Thermal insulation	The article shows that temperature fluctuations under a green roof are significantly dampened by as little as 50-100 mm of substrate. This helps preserve the roof membrane.	129	6		319	120
Collins et al.	2017	Thermal behavior of green roofs under Nordic winter conditions	Building and Environment	9	Finland	University of Helsinki	Thermal Insulation	Green roof Thermal conductivity Heat flux Energy saving Winter conditions	The thermal properties of green roofs in subzero temperatures and snow cover are tested. It is found that freezing actually decreases heat flux, due to a lower thermal bridging between frozen particles than in suspended water (bridge water effect).	0	3		180	6
Jaffal et al.	2012	A comprehensive study on the impact of green roofs on building energy performance	Renewable Energy	8	France	University of La Rochelle	Energy	Green roof Building energy efficiency Cooling demand Heating demand Thermal comfort Roof insulation	The article studies the impact of green roofs on building energy performance. A model is presented and integrated in a building thermal program. A moderate reduction in annual energy demand is found, mostly related to lowered cooling demands in summer, and thus the savings are higher in warmer climates.	267	1		365	96
Ouldbouhkitine & Belarbi	2015	Experimental characterization of green roof components	Energy Procedia	6	France	University of La Rochelle	Thermal Insulation	Green roofs; Evapotranspiration; Thermal resistance; Characterization; Porosimetry	The thermo-physical properties of green roof substrate materials and plants are determined through laboratory measurements. Mercury intrusion porosimetry is used to determine porosity.	1	0
Niachou et al.	2001	Analysis of the green roof thermal properties and investigation of its energy performance	Energy and Buildings	11	Greece	National Kapodistrian University of Athens	Thermal Insulation	Green roof; Energy; Thermal fluctuation	Some guy had fun on holiday. Measurements conducted on a real green roof that, unfortunately, is not described in any detail whatsoever. Somehow cited by 548 other articles.	548	7		48
Nektarios et al.	2014	Substrate and drainage system selection and slope stabilization in an intensive-type roof garden park: case study of Athens Concert Hall	Landscape and Ecological Engineering	18	Greece	Agricultural University of Athens	Process	Bilayered drainage Geotextile Reinforced geogrid Geocomposites Geocells	The paper documents the intensive green roof above the extension of the Athens Concert Hall, and the various substrates, drainage systems, and substrate stabilization systems utilized.	6	7		4500	20000
Vijayaraghavan	2016	Green roofs: A critical review on the role of components, benefits, limitations and trends	Renewable and Sustainable Energy Reviews	13	India	Indian Institute of Technology	MOM	Vegetated roof Best management practice Sustainable design Green building Biosorption Urban vegetation	The review provides an overview of green roof benefits, components, shortcomings/constraints (most notably costs), and trends/suggestions for the future of green roof implementation and research.	50	0	1
Viola	2017	Green roofs for built environment recovery: technological transitions	Journal of Cleaner Production	8	Italy	Università degli Studi di Napoli Federico II	MOM	Prototype Technology Integration Test Recovery Low-carbon	The paper examines whether a newly patented polyurethane foam will be suitable for applications in buildings. Trials are carried out on site and in the laboratory. It is found to be suitable, according to the examined parameters.	1	4		14	0.25
Ascione et al.	2013	Green roofs in European climates. Are effective solutions for the energy savings in air-conditioning?	Applied Energy	15	Italy	Università degli Studi di Napoli Federico II	Energy	Green roofs Cool roofs European climates Energy performances Technical feasibility	The paper verifies utility of green roofs, under environmental and energy points of view, by considering all the aspects that influence their performance. A simulated building is evaluated with several different roofing options in six cities in Europe. In dry regions, the irrigation cost can nullify savings in energy demand for airconditioning. In cold regions, green roofs are more advantageous t…	110	1		365	986
Barozzi et al.	2016	The energy impact in buildings of vegetative solutions for extensive green roofs in temperate climates	Buildings	20	Italy	Construction Technologies Institute of National Research Council of Italy	Energy	extensive green roofs; environmental monitoring; surface temperatures; building energy demand	An experimental monitoring campaign with particular focus on surface temperatures concludes that a green roof may reduce the external surface temperature by 10-20 C for I > 500 W, and 0-5 C for I < 500 W. During the winter season, the thermal gradients through the green roof are close to zero, owning to a well-insulated underlying structure.	1	4		352	9
Viola et al.	2017	Retention performance of green roofs in representative climates worldwide	Journal of Hydrology	10	Italy	Università di Cagliari	Hydrology	Greenroof, Retention	The article aims to explore retention performance of green roofs as a function of their depth in different climate regimes. Intensive and extensive roofs are investigated. The performance of a green roof increases when rainfall and potential evapotranspiration is greatest in the same season.	0	1
Barozzi et al.	2017	Measurement of Thermal Properties of Growing Media for Green Roofs: Assessment of a Laboratory Procedure and Experimental Results	Buildings	18	Italy	Construction Technologies Institute of National Research Council of Italy	Thermal Insulation	growing media; green roofs; thermal properties; laboratory tests; buildings; energy	Guarded hot plate and heat flow meter tests were carried out on 108 samples in the laboratory. Thermal conductivity is found to vary between 0.046 and 0.179 W/mK as a function of density, and between 0.046 and 0.470 W/mK as a function of moisture content (up to 50 weight-%).	0	2			1
D'Orazio et al.	2015	Green roof yearly performance: A case study in a highly insulated building under temperate climate	Energy and Buildings	13	Italy	Università Politecnica delle Marche	Thermal Insulation	Green roof Insulation Temperate climate Case study Passive cooling Thermal transmittance	The termal properties of green roofs on a well-insulated building in a temperate climate are examined. It turns out the exact insulating potential is hard to determine, but there is some benefit to installing green roofs even on insulated buildings.	59	5		365	14
Nagase & Dunnett	2011	Amount of water runoff from different vegetation types on extensive green roofs: Effects of plant species, diversity and plant structure	Landscape and Urban Planning	8	Japan	Chiba University (Matsudo)	Hydrology	Urban landscape Urban hydrology Stormwater management Species richness Plant selection	The article examines the water-runoff-affecting properties of 12 different species from three plant groups. In this study, species variety within a roof did not affect the retention capacity of the test area compared to monocultures. In general, grasses performed better than forbs or sedum.	125	2		213
Jim	2017	An archaeological and historical exploration of the origins of green roofs	Urban Forestry and Urban Greening	11	China	University of Hong Kong	Others	Green roof origin, Arctic geographical origin, Spontaneous meadow roof, Intentional sod roof, Vernacular architecture, Ecosystem service	Jim does as the title of the paper promises, and gives some historical context to the origins of green roofs.	1	0
Tsang & Jim	2013	A stochastic model to optimize forecast and fulfillment of green roof demand	Urban Forestry and Urban Greening	8	China	University of Hong Kong	Others	Demand forecast Demand-responsive optimal-inventory model (DOM) Green roof Inventory optimization Operations management	A stochastic model is made to estimate demand of green roofs, and how to best meet them, that is optimizing inventory. The findings suggest adopting the safe lower limit of demand fluctuations to prevent overstocking.	8	0
Xiao et al.	2014	A review of green roof research and development in China	Renewable and Sustainable Energy Reviews	16	China	Hunan University	Others	Green roof Research and development China	The article gives an overview of green roof benefits and construction techniques used in China, as well as Chinese research into the field.	26	0	1
Li & Yeung	2014	A comprehensive study of green roof performance from environmental perspective	International Journal of Sustainable Built Environment	8	China	The Hong Kong Institute of Education	LCA	Sedum; CAM; Albedo effect; Biodiversity	The article gives an overview of the environmental benefits of green roofs, citing many previous studies. Non-native plant species have been found to have a higher survival rate than natives in previous field tests. Barriers for applying extensive green roof systems are listed.	27	0	1
Zhang et al.	2012	Barriers to implement extensive green roof systems: A Hong Kong study	Renewable and Sustainable Energy Reviews	6	China	The Hong Kong Polytechnic University	Policy	Extensive green roof Barriers Sustainable development Hong Kong	Eleven such barriers are identified by the authors, and ranked by respondents to a survey. The factor considered the biggest barrier is a lack of promotion/incentives from the government and social communities. The increase of maintenance costs is seen as a bigger barrier than the increase of design/construction costs.	77	0
Wong et al.	2016	Facilitating effective green procurement in construction projects: An empirical study of the enablers	Journal of Cleaner Production	13	China	The Hong Kong Polytechnic University	Process	Green procurement Sustainability Construction projects Hong Kong	The paper examines the factors that are important in enhancing green procurement in the construction process. The top three most significant factors identified are mandatory environmental regulations by the government, client requirement in tendering, and government/NGO requirements. Note that the used definition of "green prcurement" does not necessarily involve green roofs.	5	0
Peng & Jim	2015	Economic evaluation of green-roof environmental benefits in the context of climate change: The case of Hong Kong	Urban Forestry and Urban Greening	8	China	University of Hong Kong	Economy	Air pollutants removal Carbon sequestration Thermal insulation UHI mitigation Upstream emissions reduction	Six climate-related benefits of green roofs are studied for the case of Hong Kong: thermal insulation, UHI mitigation, avoided upstream emissions of CO2 and air pollutants, CO2 sequestration, and air pollutants removal. Extensive green roofs are more economically attractive than intensive in terms of benefit/cost ratio and payback period. Payback period estimated to be 7 years for extensive and 1…	18	0
Rakoton-dramiarana et al.	2015	Dynamic simulation of the green roofs impact on building energy performance, case study of Antananarivo, Madagascar	Buildings	24	Madagascar	University of Antananarivo	Energy	green roof; building energy performance; thermal comfort; simulation; global sensitivity analysis	Green and conventional roofs are compared under the climate conditions of Antananarivo, Madagascar. The study shows that green roofs protect the roof structure under extreme temperatures and large temperature fluctuations. The impact on indoor air temperature and energy demand is also investigated, and a sensitivity analysis performed. It is shown that green roofs have almost insignificant impact…	3	1		365	9
Saadatian et al.	2013	A review of energy aspects of green roofs	Renewable and Sustainable Energy Reviews	14	Malaysia	Universiti Kebangsaan Malaysia	Energy	Green roofs Environmental and economic benefits Energy Plants	The review considers the following energy-related aspects of green roofs: Plant types, seasonal performance, cooling load, heat flux, growing medium's characteristics, effect of materials, heat island effect, acoustic performance, and maintenance.	102	0	1
Azis et al.	2015	The effect of green envelope components on green building value	Property Management	21	Malaysia	Universiti Teknologi Malaysia	Economy	Green building, Building value, GBI, Green benefit, Green envelope component, Hot humid	Various building components and their effects on building value are examined (in a Malaysian context). Green roofs comprise only a small part of this study, but are found to be overall very beneficial to building value.	0	0
Mahdiyar et al.	2016	Probabilistic private cost-benefit analysis for green roof installation: A Monte Carlo simulation approach	Urban Forestry and Urban Greening	11	Malaysia	Universiti Teknologi Malaysia	Economy	Cost-benefit analysis Green roof Monte Carlo simulation Net present value Payback period	The NPV and payback time of extensive and intensive green roofs in Kuala Lumpur are analysed. They are both found to be a low-risk investment, the extensive moreso than the intensive. The payback time is found to range between four and six years.	2	0
Solcerova et al.	2017	Do green roofs cool the air?	Building and Environment	7	The Netherlands	Delft University of Technology	Energy	Urban heat island Climate Vegetation Sedum Air temperature Soil moisture	Not necessarily (See Betteridge's Law of Headlines). While the underlying building is cooled in daytime, the increased albedo of the green roof compared to a black roof heats up the air. At night, evaporation cools the air, given that the roof is wet enough to have water to evaporate.	1	5		1480	200
Mees et al.	2012	Exploring the Scope of Public and Private Responsibilities for Climate Adaptation	Journal of Environmental Policy & Planning	26	The Netherlands	Utrecht University	Rules & Regulations	climate adaptation, responsibilities, public–private divide	The article presents a conceptual framework for discussing issues of the public-private divide in climate adaptation. The framework is applied to a specific case using green roofs as a storm water management measure in Rotterdam.	58	0
Mees et al.	2013	Who governs climate adaptation? Getting green roofs for stormwater retention off the ground	Journal of Environmental Planning and Management	24	The Netherlands	Utrecht University	Rules & Regulations	climate adaptation, responsibilities, public–private divide	The article sums up green roof laws and incentives in four European and one American city. Herarchical arrangements (policies) are found to be the most effective for the implementation of green roofs.	30	0
Fassman-Beck et al.	2013	4 Living roofs in 3 locations: Does configuration affect runoff mitigation?	Journal of Hydrology	10	New Zealand	University of Auckland	Hydrology	Living roof Green roof Hydrology Stormwater runoff Flow attenuation Urban runoff	Four extensive green roofs in New Zealand are evaluated over extended periods for stormwater runoff mitigation. Up to 56 % cumulative retention was measured, with runoff rarely occurring from storms with less than 25 mm of precipitation. Seasonal retention performance decreased only slightly in winter.	63	7		720	217
Thodesen et al.	2018	Adapting green-blue roofs to Nordic climate	(ikke publ.)		Norway	NTNU	Others	Nordic climate, climate adaptation, green roofs, performance	A review of the research into the effects of Nordic climates on extensive green roof selection and performance. A scoping study is performed. Research and knowledge gaps, as of 2015, are identified.	0	0	1
Johannessen et al.	2017	Green roof performance potential in cold and wet regions	Ecological Engineering	12	Norway	NTNU	Hydrology	Extensive green roofs, Evapotranspiration, Stormwater Retention, Drought, Cold climate	Article on hydrology. Green roofs are still the shit.	0	0
Skjeldrum & Kvande	2017	Moisture-resilient upgrading to blue-green roofs	Energy Procedia	6	Norway	NTNU	Policy	Blue-green roofs; Upgrading; Building technical challenges; Climate adaptation; Moisture-resilience; Urbanism; Exisiting buildings	The study identifies building technical challenges related to the upgrading of roofs to blue-green roof systems. Key challenges are identified and listed via interviews with industrial and academic actors.	0	0
Silva et al.	2015	Green roofs in Mediterranean areas - Survey and maintenance planning	Building and Environment	13	Portugal	University of Lisbon	MOM	Green roofs In-service survey Maintenance planning Mediterranean area	The maintenance schedules of eleven green roofs in Portugal were examined and documented through in-situ surveys. A maintenance form is presented, and a maintenance plan suggested. The study also shows that some design recommendations were not followed.	10	8		9125	45000
Tundrea et al.	2014	Environmental impact assessment and thermal performances of modern earth sheltered houses	Environmental Engineering and Management Journal	7	Romania	Technical University of Iasi	LCA	earth sheltered houses, energy consumption, environmental impact, global warming potential	The thermal performance of a whole earth-sheltered house is modelled. It is found to have a lower environmental impact and thermal transmittance than a comparable building above ground.	4	1
Mahmoud et al.	2017	Energy and Economic Evaluation of Green Roofs for Residential Buildings in Hot-Humid Climates	Buildings	14	Saudi Arabia	King Fahd University of Petroleum and Minerals	Economy	green roof; buildings energy conservation; sustainability; energy-savings; net present value; hot humid climates	The paper examines the energy and economic viability of green roof technology in the climate of Saudi Arabia. The annual energy consumption of a case building is found to be reduced from 169 to 110 kWh/m2 with the application of a green roof on the entire structure. An NPV approach shows that the benefits of the green roof technology are realized towards the end of the life cycle of the building,…	4	1
Arkar et al.	2015	Lightweight green roofs’ thermal response under freezing conditions	Energy Procedia	6	Slovenia	University of Ljubljana	Thermal Insulation	green roof; mineral wool growing media; thermal response; phase change process; field experiment	It is shown that the temperature under a green roof changes very slowly compared to the temperature on a reference roof in erratic ambient temperature conditions. The heat flux through a green roof is lower than that of the reference roof.	3	5		120	9
Fernandez-Cañero et al.	2013	Green roof systems: A study of public attitudes and preferences in southern Spain	Journal of Environmental Management	10	Spain	University of Seville	Aesthetics	Urban greening Design Aesthetic Preconceptions People’s preferences	450 respondents from Seville, Spain, were asked about their perceptions of green roofs. The survey shows that roofs with a greater variety of colours and vegetation were preferred over more "natural" alternatives. Certain misconceptions about green roofs are also common.	46	0
Coma et al.	2017	Thermal characterization of different substrates under dried conditions for extensive green roofs	Energy and Buildings	6	Spain	Universitat de Lleida	Thermal Insulation	Extensive green roofs Substrates Thermal properties Passive system Energy savings	Five kinds of substrates commonly used in Mediterranean green roofs were dried and analyzed. It was found that the K-value and thermal storage capacity varied between different substrates, but stayed well within the same order of magnitude (variation: K 0.138-0.199 W/mK, Cp 724-873 J/kgK). Substrates with low organic content showed the highest rates of volumetric heat storage capacity.	0	2
Galbrun & Scerri	2017	Sound insulation of lightweight extensive green roofs	Building and Environment	10	United Kingdom	Heriot-Watt University, Edinburgh	Others	Building acoustics Sound insulation Green roofs	Green roof samples are tested in an acoustic laboratory. Generally good sound insulation properties are documented, depending on the features of the roof. The authors stress that this is a small-scale test.	0	3			1
Nagase & Dunnett	2013	Establishment of an annual meadow on extensive green roofs in the UK	Landscape and Urban Planning	13	United Kingdom	Chiba University (Matsudo)	MOM	Urban landscape Seed mixture Irrigation Germination Competition Long flowering	Test plots for a green roof are sown on a roof in Sheffield in June 2006. Plant development was assessed throughout the establishment period, and finally by harvesting plants in October of the same year. Watered plots had a higher density of plants than non-watered throughout the establishment period.	32	5		119	13.2
Wootton-Bear et al.	2016	Review: Improving the impact of plant science on urban planning and design	Buildings	28	United Kingdom	Aberystwyth University	MOM	biomimicry; plants; architecture; future cities; urban planning	The review contends the general notion that "green is good", however it is shown that there is room for significant improvement regarding the contribution of plant science to the role of green infrastructure. Specifically, plant science could be utilized to create better solutions for the management of light, heat, water, and CO2.	3	0	1
Castleton et al.	2010	Green roofs; building energy savings and the potential for retrofit	Energy and Buildings	10	United Kingdom	University of Sheffield	Energy	Green roof Energy consumption Structural capacity Retrofit Insulation	More than half of UK building stock as of 2010 was built before any roof insulation was required. In light of this, the authors examine the potential energy savings of installing green roofs. It is found that thicker layers of lighter, drier substrate will contribute more to insulation. Green roofs on well-insulated buildings will save very little energy, if any.	514	0	1
White & Gatersleben	2011	Greenery on residential buildings: Does it affect preferences and perceptions of beauty?	Journal of Environmental Psychology	10	United Kingdom	University of Surrey	Aesthetics	Green roof Green façade Vegetation Restoration Beauty Preference	Participants in a survey were shown photographs of buildings with and without greenery. Results indicate that the buildings with greenery where significantly more preferred than those without. Ivy facades and meadow roofs were rated the highest, while turf, brown, or Sedum roofs rated barely differently from bare roofs. The findings are consistent with other areas of landscape research and the cl…	93	0
Speak et al.	2012	Urban particulate pollution reduction by four species of green roof vegetation in a UK city	Atmospheric Environment	11	United Kingdom	The University of Manchester	Pollution	PM10 Green roof Sedum Magnetic biomonitoring	Common green roof plants are planted next to a major road in Manchester and sampled for pollutants. It is found that the selected plants can contribute to particle capture, and therefore act as a pollution filter in an urban setting. Grass roofs would be more effective at capturing PM10 than extensive green roofs.	104	2		31
De-Ville et al.	2017	The impact of green roof ageing on substrate characteristics and hydrological performance	Journal of Hydrology	13	United Kingdom	University of Sheffield	Hydrology	Green roof Substrate Physical properties Hydrological performance Ageing X-ray microtomography	The physical properties of 12 green roof substrate cores (some virgin, some 5 years old from green roof test beds) are evaluated using XMT imaging. There are significant structural differences (density, pore- and particle sizes) between virgin and aged samples, but they are not found to significantly affect hydrological characteristics. Observed effects of ageing on hydrological performance are m…	1	2		1800
Stovin et al.	2013	A modelling study of long term green roof retention performance	Journal of Environmental Management	10	United Kingdom	University of Sheffield	Hydrology	Evapotranspiration Green roof Stormwater management Retention Return period	The paper outlines the development of a conceptual hydrological flux model for the long term continuous simulation of runoff and drought risk for green roof systems. It is shown that retention performance is dependent upon local climatic conditions. Aging of the roof is not taken into account.	81	1		365
Stovin et al.	2012	The hydrological performance of a green roof test bed under UK climatic conditions	Journal of Hydrology	14	United Kingdom	The university of Sheffield	Hydrology	Green roof Stormwater management Retention Return period Detention Substrate	A green roof test bed's hydrological performance is monitored over a period spanning a little more than two years. The annual performance figures are in the lower end of a range of international data, probably because of climate conditions that are colder and wetter than average. A model predicting runoff is attempted, but found to be insufficient due to the complexity of inter-event processes.	155	3		881	3
Wild et al.	2017	Comprehending the multiple ‘values’ of green infrastructure – Valuing nature-based solutions for urban water management from multiple perspectives	Environmental Research	9	United Kingdom	University of Sheffield	Economy	Valuation Green Infrastructure Urban water Nature based solutions Economics	The article compares and examines different attempts to evaluate the benefits of of urban greening options and future development scenarios. Two hypothetical future re-development scenarios were assessed with regards to economic viability. Results show that show that residents would be willing to pay more for greener infrastructure, but not neccesarily enough to cover the costs for the developer.	0	0
Pastore et al.	2017	The effects of vegetation on indoor thermal comfort: The application of a multi-scale simulation methodology on a residential neighborhood renovation case study	Energy and Buildings	11	Switzerland	Ecole Polytechnique Fédérale de Lausanne (EDFL)	Energy	Building integrated vegetation Bioclimatic design Microclimate mitigation Building energy retrofit Social housing renovation Thermal comfort	The case study describes buildings in Palermo, Italy, and the potential impacts on thermal comfort by various retrofit measures involving green roofs and walls (mostly related to cooling).	0	1
Bengtsson et al.	2004	Hydrological function of a thin extensive green roof in southern Sweden	Nordic Hydrology	10	Sweden	Lund University	Hydrology	Green roof; sedum-moss; urban runoff; water balance	As alluded to by the title, the hydrologgical function of a thin, extensive green roof is investigated. It is concluded that even a very thin greenroof (4 cm) can reduce the annual runoff by approximately half.	159	4		365	5
Berndtsson	2010	Green roof performance towards management of runoff water quantity and quality: a review	Ecological Engineering	10	Sweden	Lund University	Hydrology	Green roofs Vegetated roofs Stormwater runoff Runoff quality Urban	Review article discussing and comparing the different studies on hydrologic properties of green roofs. The effects on water pollution are also discussed.	560	0	1
Villareal & Bengtsson	2005	Respose of a Sedum green-roof to individual rain events	Ecological Engineering	7	Sweden	Lund University	Hydrology	Sedum album; Green-roof; Stormwater; Unit hydrograph; Linear programming	Several controlled experiments are performed on a Sedum green-roof in order to estimate a unit hydrograph. Results indicate that roof slope had no effect on the direct runoff hydrograph. The retention capacity was affcted by whether roofs were dry or wet.	267	3		9	1.5
Edwards et al.	2014	Quality-assured solutions for green roof gardens on concrete decks with zero tolerance for leaks	WIT Transactions on Ecology and The Environment	11	Sweden	Swedish University of Agricultural Sciences	Rules & Regulations	Green roof garden, guidelines	The paper asks for guidelines concerning certain specific aspects of green roofs. In particular, the lack of national standards in most of Europe (at the time of writing) is given special attention. A future (now current) research project and its work packages are described.	3	0
Shafique et al.	2016	The potential of green-blue roof to manage storm water in urban areas	Nature Environment and Pollution Technology	5	South Korea	University of Science and Technology	Hydrology	Green-blue roof Peak flow Stormwater runoff reduction Urban area	The article discusses the potential of green-blue roofs to reduce storm water runoff.	2	6		5	285
Kim et al.	2012	Economic and Environmental Evaluation Model for Selecting the Optimum Design of Green Roof Systems in Elementary Schools	Environmental Science & Technology	9	South Korea	Yonsei University	Economy	(none given)	LCC of green roofs in South Korea. Green roofs are found not to be an immediately evonomically benecifial investment, but given the valuation of environmental benefits, they will be financially worthwhile, although by a small margin.	52	0
Vacek & Matejka	2016	Ageing documentation of hydrophilic mineral wool used in green roof assemblies	Applied Mechanics and Materials	7	Czech Republic	Brno University of Technology	MOM	green roof, hydrophilic mineral wool, ageing, storm-water management	Mineral wool is used as a water storage medium in certain green roofs. The authords describe and test the degradation of the mineral wool after several months of use in a real greenroof. It is noted that the uniform thickness and compression strength are severely compromised after only 16 months of use, and that roots will penetrate mineral wool layers 8 cm think or more.	0	7		480
Vacek et al.	2017	Life-cycle study on semi intensive green roofs	Journal of Cleaner Production	11	Czech Republic	Brno University of Technology	LCA	Environmental impacts Green roofs Semi intensive greening Life-cycle assessment	Four different semi-intensive green roof assemblies are evaluated in an LCA. Substituting some of the growth medium with extra insulation material (mineral wool, EPS) caused higher environmental impacts in production, but decreased it in later life stages. Overall, it was found that "pure" substrate had the lowest impacts in most categories, whereas excessive mineral wool usage or EPS had the hig…	2	0
Köhler & Poll	2010	Long-term performance of selected old Berlin greenroofs in comparison to younger extensive greenroofs in Berlin	Ecological Engineering	8	Germany	University of Applied Sciences Neubrandenburg	Others	Berlin Extensive greenroofs Biodiversity Species richness Growing media Acid deposition	Old tar-paper greenroofs in Berlin are compared to modern extensive greenroofs. The old roofs, though dwindling in number for unrelated reasons, are shown to remain resilient even after a century in use. Still, the build quality and biodiversity of modern roofs is at least on par with the TPG roofs, if not better.	71	8		36500
Zirkelbach et al.	2017	A hygrothermal green roof model to simulate moisture and energy performance of building components	Energy and Buildings	13	Germany	Fraunhofer Institute for Building Physics	MOM	Green roof model, Hygrothermal simulation, Vegetation layer, Moisture damage	The article describes a comprehensive hygrothermal model for green roofs, validated by field test results. Conditions above the roof membrane are considered.	0	5		410	13
Peri et al.	2012	The cost of green roofs disposal in a life cycle perspective: Covering the gap	Energy	9	Germany	Technische Universitaet Berlin	Economy	Green roof Life cycle costing (LCC) Disposal phase Substrate Life cycle perspective Landfill	The article briefly reviews papers regarding the economic evaluation of green roofs. A waste scenario for a green roof disposal case study is set up. It is shown that soil disposal accounts for 85 % of the disposal costs of a green roof, which in turn account for roughly 4 % of total green roof costs.	34	0
Porsche & Köhler	2003	Life Cycle Costs of green roofs - A comparison of Germany, USA, and Brazil	RIO 3 - World Climate & Energy Event	7	Germany	University of Applied Sciences Neubrandenburg	Economy	(none given)	The costs and benefits of different roof types (regular bitumen membrane, gravel roof, green roofs of various intensities) are summed up and utilized for LCC calculations.	2	0
Hoskins & Homer	2015	Effects of green roofs on fire safety	AEI 2015	10	USA	Oklahoma State University	Others	(none given)	The article considers structural implications of a refurbished green roof in a fire scenario. The extra weight of the green roof will lead to collapse significantly earlier than assumed for the original structure. Some practical implications for firefighters are also considered.	0	1
Butler & Orians	2011	Sedum cools soil and can improve neighboring plant performance during water deficit on a green roof	Ecological Engineering	8	USA	Tufts University (Massachusetts)	MOM	Drought stress Facilitation Competition Nurse plant Roof garden Biodiversity	Multiple plants are grown alongside Sedum, to assess whether the presence of Sedum will help the other plants survive water deficit. Using Sedum as "nurse plants", other species fare better under water-deficit conditions.	93	4		1250	5
Moody & Sailor	2013	Development and application of a building energy performance metric for green roof systems	Energy and Buildings	8	USA	Portland State University (Oregon)	Energy	Green roofs Building energy modeling Thermally massive systems, Sustainable roofing Energy performance	The study develops a thermal performance metric for vegetated roof systems: Dynamic Benefit of Green Roofs (DBGR), which is the ratio of HVAC energy use for a building with a conventional roof vs. a green roof. If the green roof provides lower energy usage than a conventional one, the DBGR is greater than one. DBGR is estimated for a hypothetical office building in four climates in the US. It is …	42	0
Sailor	2008	A green roof model for building energy simulation programs	Energy and Buildings	13	USA	Portland State University (Oregon)	Energy	Green roof; Ecoroof; Energy model; EnergyPlus; Building energy; Simulation	The article describes a model to be implemented in EnergyPlus, simulating the energy and moisture balance of green roofs.	425	1		56	156
Jungels et al.	2013	Attitudes and aesthetic reactions toward green roofs in the Northeastern United States	Landscape and Urban Planning	9	USA	Cornell University (New York)	Aesthetics	Green roofs Landscape preference Landscape attitudes Living roofs Urban greening	Visitors to seven green roof sites in the US were surveyed about their aesthetic reactions to the roofs. Reactions and attitudes were largely positive, and negative reactions were mostly associated with perceptions of messiness. Sedum-dominated roofs blended better in with the roof than grass-dominated ones.	46	0
Rowe	2011	Green roofs as a means of pollution abatement	Environmental Pollution	11	USA	Michigan State University	Pollution	Air pollution Carbon sequestration Energy conservation Stormwater quality Vegetated roofs	The review encompasses published researc on how green roofs can help mitigate pollution, how green roof materials influence the magnitude of these benefits, and suggests future research directions. Specifically, review categories are: Air pollution, carbon dioxide, fewer roofing materials in landfills, runoff water quality, and noise reduction.	329	0	1
Carter & Rasmussen	2006	Hydrologic behavior of vegetated roofs	Journal of the American Water Resources Association	14	USA	University of Georgia	Hydrology	Environmental impacts; urbanization; best management practices; stormwater management; impervious surfaces; vegetated roofs	Another article investigating the potential for stormwater control using green roofs. The roof's capability to delay peak runoff and retain flows are investigated, and some hydrological factors quantified.	261	5		395	42.64
Li & Babcock	2014	Green roof hydrologic performance and modeling: a review	Water Science & Technology	12	USA	University of Hawaii	Hydrology	green roof, hydrology, model, runoff, stormwater	Reviewed literature shows that green roofs can reduce stormwater runoff volume by 30 to 86 %, reduce peak flow rate by 22 to 93 %, and delay the peak flow by 0 to 30 minutes. As the effectiveness varies substantially due to design characteristics, it is difficult to predict green roof performance.	54	0	1
Pierre et al.	2010	Thermal performance of green roof panels in sub-zero temperatures	Journal of Green Building	14	USA	Turner Construction/ Arup	Thermal Insulation	green roofs, thermal performance, R-value, low temperature, hot box tests	Green roofs aof two thicknesses (100 and 150 mm) were tested in sub-freezing temperatures against a heated roof in a hot-box. Adding a green roof increased the R-value for a roof from 2.82 to 3.7. The thickness of the growing medium was not found to have a significant impact on insulation properties.	6	3		1	1
Tang & Qu	2016	Phase change and thermal performance analysis for green roofs in cold climates	Energy and Buildings	11	USA	Purdue University (Indiana)	Thermal Insulation	Green roof Thermal performance Phase change Cold climates	The paper examines the effect of the phase change of water on the thermal properties of green roofs. It is found to reduce the heat loss by about 19 % compared to traditional roofs.	6	8		2555	165
Zhao & Srebric.	2012	Assessment of green roof performance for sustainable buildings under winter weather conditions	Journal of Central South University	6	USA	Pennsylvania State University	Thermal Insulation	green roof; energy savings; building envelop; sustainable buildings	Preliminary version of the 2015 article by the same authors.	29	5		120	14
Zhao et al.	2015	Accumulated snow layer influence on the heat transfer process through green roof assemblies	Building and Environment	10	USA	Pennsylvania State University	Thermal Insulation	Green roof Snow Heat transfer Snow conductivity	It is found that the heat flux through greenroofs is recuced by approx. 23% compared to a conventional roof, but the difference is only 5 % with a layer of snow (avg. measured snow depth) on top.	7	5		120	14
Berardi et al.	2014	State-of-the-art analysis of the environmental benefits of green roofs	Applied Energy	18	USA	Worcester Polytechnic Institute, Massachusetts.	LCA	Green roofs Sustainable design Low-energy buildings Environmental benefit	A rather comprehensive literature review on the benefits of green roofs, with particular emphasis on water management and reduction of air pollution.	171	0	1
Getter & Rowe	2006	The role of extensive green roofs in sustainable development	HortScience	10	USA	Michigan State University	LCA	vegetated roof, ecoroof, stormwater management, energy conservation, plant evaluation	The article is a review of the knowledge regarding the benefits of green roofs, plant selection and culture, as of 2006. The focus of the review is primarily on extensive green roofs. Findings suggest that nurseries that are growing ground covers, perennials, or grasses will have the most to gain.	574	0	1
Carter & Fowler	2008	Establishing green roof infrastructure through environmental policy instruments	Environmental Management	14	USA	University of Georgia	Policy		The article describes various requirements and incentives to encourage the use of green roofs in select US cities. A certain lack of data makes it hard to determine whether these policies have resulted in a greater number of green roof projects.	125	0
Grant & Jones	2008	A decision-making framework for vegetated roofing system selection	Journal of Green Building	16	USA	Virginia Polytechnic Institute and State University	Process	vegetated roof, green roof, decision support system, decision-making framework, Choosing By Advantages	A framework for evaluating green roofs is described, combining green roof characteristics from the FLL guide with the Choosing By Advantages model. A test of the framework could unfortunately not be completed.	27	0
Lindow & Michener	2007	Retrofitting a green roof on an existing facility: A case history	Journal of ASTM International	8	USA	Soil and Materials Engineers, Inc.	Process	roofing, vegetated roof covering, storm water	The article describes a real green roof retrofitting project, with a brief overview of most aspects to be considered, such as funding, design, and maintenance. While not making any groundbreaking new discoveries, it nonetheless provides an excellent overview of factors and aspects to be considered.	0	7		365	1760
Dvorak	2011	Comparative analysis of green roof guidelines and standards in Europe and North America	Journal of Green Building	22	USA	Texas A&M University	Rules & Regulations	FLL guidelines, performance guidelines, regulation, ecoregion, vegetated roofs	The German FLL guidenlines were compared to American standards on green roofs. The American standards and guidelines were found to be comparatively fragmented, with at least six different documents governing green roofs, and lacking in the fields of drainage media, growth media, post-construction testing, and root barriers, among others.	12	0
Clark et al.	2008	Green Roof Valuation: A Probabilistic Economic Analysis of Environmental Benefits	Environmental Science & Technology	7	USA	University of Michigan	Economy	(none given)	Economical benefits of environmental benefits of green roofs are quantified and used in NPV calculations for an extensive green roof. Without such benefits, the NPV (cost) of a green roof is 20-25 % lower than for conventional roof. Including the benefits, the figure is 25-40 % lower instead.	209	0
Ichihara & Cohen	2010	New York City property values: What is the impact of green roofs on rental pricing?	Letters in Spatial and Resource Sciences	10	USA	University of Hartford (Connecticut)	Economy	Green roofs · Apartment rental prices · Hedonic methods · Stormwater runoff	Green roofs are found to increase rental prices in a (very very VERY high end) apartment complex in New York City by as much as 16 %. Results may be somewhat skewed by the high-end location of the complex.	23	0
McRae	2016	Case study: A conservative approach to green roof benefit quantification and valuation for public buildings	The Engineering Economist	17	USA	US Army, Fort Carson	Economy	(none given)	The author compares the life cycle costs of a green and a conventional roof on a 100,000 sq. ft. building in a 25-year perspective. While both roofs cost around a million dollars over the time period (Net Present Value), the green roof ends up 0.5 % cheaper, not factoring in pollution or social benefits.	1	0
Niu et al.	2010	Scaling of Economic Benefits from Green Roof Implementation in Washington, DC	Environmental Science & Technology	7	USA	University of Michigan	Economy	(none given)	Various environmental benefits of green roofs are quantified, as well as energy savings and the impact on fees (i.e. stormwater fees) in Washington, DC. Totalling this, the NPV of green roofs end up 30-40 % less than that of conventional roofs, not counting green roof maintenance costs. The break-even point is estimated to be around 7 years.	78	0
Scharf & Zluwa	2017	Case study investigation of the building physical properties of seven different green roof systems	Energy and Buildings	10	Austria	University of Natural Resources and Life Sciences, Wien.	Thermal Insulation	Building greenery Green roofs Building physics Heat flux U-value	The insulating properties of seven different greenroof constructions were tested over a five-year period. U-values were generally (but not universally) higher (worse) in winter than in summer. The highest-performing greenroof had a winter U-value of 0.3 W/m2K, with a thickness of 30 cm.	0	5		675	28
Brudermann & Sangkakool	2016	Green roofs in temperate climate cities in Europe - An analysis of key decision factors	Urban Forestry and Urban Greening	11	Austria	University of Graz	Process	Analytical hierarchy process, Green roofs, Multi-criteria decision analysis, SWOT/AHP, Urban green infrastructure, Urban policy	A SWOT analysis is performed on green roofs, and interviews with industry experts are conducted to perform an AHP ranking. It is found that the positive aspects of green roof generally carry greater weight than the negatives. The most important single factors were flood risk reduction, environmental benefits, and the influence on green politics/strategies in cities.	2	0

## Sheet: Assorted graphs
Maturity	Number
0	49
1	10
2	7
3	5
4	6
5	12
6	3
7	5
8	3
9	0
Sum	100
Category	Number
Others	7
MOM	9
Energy	11
Aesthetics	4
Pollution	2
Hydrology	16
Thermal Insulation	16
LCA	8
Policy	4
Process	5
Rules & Regulations	4
Economy	14
Sum	100
Year of publication	Number of articles
2001	1
2002	0
2003	2
2004	1
2005	2
2006	2
2007	3
2008	5
2009	1
2010	6
2011	6
2012	11
2013	10
2014	9
2015	11
2016	12
2017	17
2018	1
Sum	100
Author	Title	Category		Category	Number
Xiao et al.	A review of green roof research and development in China	Others		Others	1
Vijayaraghavan	Green roofs: A critical review on the role of components, benefits, limitations and trends	MOM		MOM	2
Wootton-Bear et al.	Review: Improving the impact of plant science on urban planning and design	MOM		Energy	2
Castleton et al.	Green roofs; building energy savings and the potential for retrofit	Energy		Aesthetics	0
Saadatian et al.	A review of energy aspects of green roofs	Energy		Pollution	1
Rowe	Green roofs as a means of pollution abatement	Pollution		Hydrology	2
Berndtsson	Green roof performance towards management of runoff water quantity and quality: a review	Hydrology		Insulation	0
Li & Babcock	Green roof hydrologic performance and modeling: a review	Hydrology		LCA	6
Getter & Rowe	The role of extensive green roofs in sustainable development	LCA		Policy	0
Oberndorfer et al.	Green roofs as urban ecosystems: ecological structures, functions, and services	LCA		Process	0
Berardi et al.	State-of-the-art analysis of the environmental benefits of green roofs	LCA		Regulations	0
Li & Yeung	A comprehensive study of green roof performance from environmental perspective	LCA		Economy	1
Bianchini & Hewage	Probabilistic social cost-benefit analysis for green roofs: A lifecycle approach	Economy		Sum	15
Author	Title	Category	Citations		Category	Number
Oberndorfer et al.	Green roofs as urban ecosystems: ecological structures, functions, and services	LCA	802		Others	0
Berndtsson	Green roof performance towards management of runoff water quantity and quality: a review	Hydrology	560		MOM	1
Getter & Rowe	The role of extensive green roofs in sustainable development	LCA	554		Energy	3
Niachou et al.	Analysis of the green roof thermal properties and investigation of its energy performance	Thermal Insulation	548		Aesthetics	0
Castleton et al.	Green roofs; building energy savings and the potential for retrofit	Energy	514		Pollution	1
Sailor	A green roof model for building energy simulation programs	Energy	425		Hydrology	6
Rowe	Green roofs as a means of pollution abatement	Pollution	329		Thermal insulation	4
Jaffal et al.	A comprehensive study on the impact of green roofs on building energy performance	Energy	267		LCA	4
Villareal & Bengtsson	Respose of a Sedum green-roof to individual rain events	Hydrology	267		Policy	0
Teemusk & Mander	Rainwater runoff quantity and quality performance from a greenroof: The effects of short-term events	Hydrology	262		Processes	0
Carter & Rasmussen	Hydrologic behavior of vegetated roofs	Hydrology	261		Rules & Regulations	0
Clark et al.	Green Roof Valuation: A Probabilistic Economic Analysis of Environmental Benefits	Economy	209		Economy	1
Liu & Baskaran	Thermal performance of green roofs through field evaluation	Thermal Insulation	207		Sum	20
Berardi et al.	State-of-the-art analysis of the environmental benefits of green roofs	LCA	171
Bengtsson et al.	Hydrological function of a thin extensive green roof in southern Sweden	Hydrology	159
Stovin et al.	The hydrological performance of a green roof test bed under UK climatic conditions	Hydrology	155
Liu & Minor	Performance evaluation of an extensive green roof	Thermal Insulation	147
Bianchini & Hewage	How "green" are the green roofs? Lifecycle analysis of green roof materials	LCA	141
MacIvor & Lundholm	Performance evaluation of native plants suited to extensive green roof conditions in a maritime climate	MOM	136
Teemusk & Mander	Greenroof potential to reduce temperature fluctuations of a roof membrane: A case study from Estonia	Thermal Insulation	129

## Sheet: Maturity by category
Authors	Title	Category	Roof maturity
Köhler & Poll	Long-term performance of selected old Berlin greenroofs in comparison to younger extensive greenroofs in Berlin	Andre	8
						Category Roof maturity	Others	MOM	Energy	Aesthetics	Pollution	Hydrology	Insulation	LCA	Policy	Process	Regulations	Economy
Tsang & Jim	A stochastic model to optimize forecast and fulfillment of green roof demand	Andre	0			0	4	2	4	4	1	3	1	6	4	3	4	13
Xiao et al.	A review of green roof research and development in China	Andre	0			1	1	0	5	0	0	2	0	1	0	0	0	1
Hoskins & Homer	Effects of green roofs on fire safety	Andre	1			2	0	0	0	0	1	3	2	1	0	0	0	0
Thodesen et al.	Adapting green-blue roofs to Nordic climate	Andre	0			3	1	0	0	0	0	2	2	0	0	0	0	0
Galbrun & Scerri	Sound insulation of lightweight extensive green roofs	Andre	3			4	0	3	1	0	0	2	0	0	0	0	0	0
Jim	An archaeological and historical exploration of the origins of green roofs	Andre	0			5	0	2	1	0	0	1	8	0	0	0	0	0
Butler & Orians	Sedum cools soil and can improve neighboring plant performance during water deficit on a green roof	Drift	4			6	0	0	0	0	0	2	1	0	0	0	0	0
MacIvor & Lundholm	Performance evaluation of native plants suited to extensive green roof conditions in a maritime climate	Drift	4			7	0	1	0	0	0	1	1	0	0	2	0	0
Nagase & Dunnett	Establishment of an annual meadow on extensive green roofs in the UK	Drift	5			8	1	1	0	0	0	0	1	0	0	0	0	0
Silva et al.	Green roofs in Mediterranean areas - Survey and maintenance planning	Drift	8			Sum	7	9	11	4	2	16	16	8	4	5	4	14	100
Vacek & Matejka	Ageing documentation of hydrophilic mineral wool used in green roof assemblies	Drift	7
Vijayaraghavan	Green roofs: A critical review on the role of components, benefits, limitations and trends	Drift	0
Wootton-Bear et al.	Review: Improving the impact of plant science on urban planning and design	Drift	0
Viola	Green roofs for built environment recovery: technological transitions	Drift	4
Zirkelbach et al.	A hygrothermal green roof model to simulate moisture and energy performance of building components	Drift	5
Bass	Should you put your energy into green roofs to reduce energy consumption in your building	Energi	0
Sailor	A green roof model for building energy simulation programs	Energi	1
Castleton et al.	Green roofs; building energy savings and the potential for retrofit	Energi	0
Pastore et al.	The effects of vegetation on indoor thermal comfort: The application of a multi-scale simulation methodology on a residential neighborhood renovation case study	Energi	1
Solcerova et al.	Do green roofs cool the air?	Energi	5
Jaffal et al.	A comprehensive study on the impact of green roofs on building energy performance	Energi	1
Moody & Sailor	Development and application of a building energy performance metric for green roof systems	Energi	0
Saadatian et al.	A review of energy aspects of green roofs	Energi	0
Ascione et al.	Green roofs in European climates. Are effective solutions for the energy savings in air-conditioning?	Energi	1
Rakoton-dramiarana et al.	Dynamic simulation of the green roofs impact on building energy performance, case study of Antananarivo, Madagascar	Energi	1
Barozzi et al.	The energy impact in buildings of vegetative solutions for extensive green roofs in temperate climates	Energi	4
White & Gatersleben	Greenery on residential buildings: Does it affect preferences and perceptions of beauty?	Estetikk	0
Fernandez-Cañero et al.	Green roof systems: A study of public attitudes and preferences in southern Spain	Estetikk	0
Jungels et al.	Attitudes and aesthetic reactions toward green roofs in the Northeastern United States	Estetikk	0
Loder	‘There’s a meadow outside my workplace’: A phenomenological exploration of aesthetics and green roofs in Chicago and Toronto	Estetikk	0
Rowe	Green roofs as a means of pollution abatement	Forurensning	0
Speak et al.	Urban particulate pollution reduction by four species of green roof vegetation in a UK city	Forurensning	2
Bengtsson et al.	Hydrological function of a thin extensive green roof in southern Sweden	Hydrologi	4
Villareal & Bengtsson	Respose of a Sedum green-roof to individual rain events	Hydrologi	5
Carter & Rasmussen	Hydrologic behavior of vegetated roofs	Hydrologi	3
Teemusk & Mander	Rainwater runoff quantity and quality performance from a greenroof: The effects of short-term events	Forurensning	6
Berndtsson	Green roof performance towards management of runoff water quantity and quality: a review	Hydrologi	0
Nagase & Dunnett	Amount of water runoff from different vegetation types on extensive green roofs: Effects of plant species, diversity and plant structure	Hydrologi	2
Stovin et al.	The hydrological performance of a green roof test bed under UK climatic conditions	Hydrologi	3
Fassman-Beck et al.	4 Living roofs in 3 locations: Does configuration affect runoff mitigation?	Hydrologi	7
Stovin et al.	A modelling study of long term green roof retention performance	Hydrologi	1
Li & Babcock	Green roof hydrologic performance and modeling: a review	Hydrologi	0
Hill et al.	Comparisons of extensive green roof media in Southern Ontario	Hydrologi	2
Sims et al.	Retention performance of green roofs in three different climate regions	Hydrologi	4
De-Ville et al.	The impact of green roof ageing on substrate characteristics and hydrological performance	Hydrologi	2
Shafique et al.	The potential of green-blue roof to manage storm water in urban areas	Hydrologi	6
Johannessen et al.	Green roof performance potential in cold and wet regions	Hydrologi	0
Viola et al.	Retention performance of green roofs in representative climates worldwide	Hydrologi	1
Niachou et al.	Analysis of the green roof thermal properties and investigation of its energy performance	Isolering	7
Liu & Baskaran	Thermal performance of green roofs through field evaluation	Isolering	5
Liu & Minor	Performance evaluation of an extensive green roof	Isolering	5
Teemusk & Mander	Greenroof potential to reduce temperature fluctuations of a roof membrane: A case study from Estonia	Isolering	6
Pierre et al.	Thermal performance of green roof panels in sub-zero temperatures	Isolering	3
Zhao & Srebric.	Assessment of green roof performance for sustainable buildings under winter weather conditions	Isolering	5
Lundholm et al.	Snow depth and vegetation type affect green roof thermal performance in winter	Isolering	5
Arkar et al.	Lightweight green roofs’ thermal response under freezing conditions	Isolering	5
D'Orazio et al.	Green roof yearly performance: A case study in a highly insulated building under temperate climate	Isolering	5
Ouldbouhkitine & Belarbi	Experimental characterization of green roof components	Isolering	0
Zhao et al.	Accumulated snow layer influence on the heat transfer process through green roof assemblies	Isolering	5
Tang & Qu	Phase change and thermal performance analysis for green roofs in cold climates	Isolering	8
Barozzi et al.	Measurement of Thermal Properties of Growing Media for Green Roofs: Assessment of a Laboratory Procedure and Experimental Results	Isolering	2
Collins et al.	Thermal behavior of green roofs under Nordic winter conditions	Isolering	3
Coma et al.	Thermal characterization of different substrates under dried conditions for extensive green roofs	Isolering	2
Scharf & Zluwa	Case study investigation of the building physical properties of seven different green roof systems	Isolering	5
Getter & Rowe	The role of extensive green roofs in sustainable development	LCA	0
Oberndorfer et al.	Green roofs as urban ecosystems: ecological structures, functions, and services	LCA	0
Bianchini & Hewage	How "green" are the green roofs? Lifecycle analysis of green roof materials	LCA	0
Berardi et al.	State-of-the-art analysis of the environmental benefits of green roofs	LCA	0
Li & Yeung	A comprehensive study of green roof performance from environmental perspective	LCA	0
Tundrea et al.	Environmental impact assessment and thermal performances of modern earth sheltered houses	LCA	1
Cubi et al.	Sustainability of rooftop technologies in cold climates	LCA	2
Vacek et al.	Life-cycle study on semi intensive green roofs	LCA	0
Carter & Fowler	Establishing green roof infrastructure through environmental policy instruments	Policy	0
Claus & Rousseau	Public versus private incentives to invest in green roofs: A cost benefit analysis for Flanders	Policy	0
Zhang et al.	Barriers to implement extensive green roof systems: A Hong Kong study	Policy	0
Skjeldrum & Kvande	Moisture-resilient upgrading to blue-green roofs	Policy	0
Lindow & Michener	Retrofitting a green roof on an existing facility: A case history	Prosess	7
Grant & Jones	A decision-making framework for vegetated roofing system selection	Prosess	0
Nektarios et al.	Substrate and drainage system selection and slope stabilization in an intensive-type roof garden park: case study of Athens Concert Hall	Prosess	7
Brudermann & Sangkakool	Green roofs in temperate climate cities in Europe - An analysis of key decision factors	Prosess	0
Wong et al.	Facilitating effective green procurement in construction projects: An empirical study of the enablers	Prosess	0
Dvorak	Comparative analysis of green roof guidelines and standards in Europe and North America	Regelverk	0
Mees et al.	Exploring the Scope of Public and Private Responsibilities for Climate Adaptation	Regelverk	0
Mees et al.	Who governs climate adaptation? Getting green roofs for stormwater retention off the ground	Regelverk	0
Edwards et al.	Quality-assured solutions for green roof gardens on concrete decks with zero tolerance for leaks	Regelverk	0
Porsche & Köhler	Life Cycle Costs of green roofs - A comparison of Germany, USA, and Brazil	Økonomi	0
Clark et al.	Green Roof Valuation: A Probabilistic Economic Analysis of Environmental Benefits	Økonomi	0
Ichihara & Cohen	New York City property values: What is the impact of green roofs on rental pricing?	Økonomi	0
Niu et al.	Scaling of Economic Benefits from Green Roof Implementation in Washington, DC	Økonomi	0
Bianchini & Hewage	Probabilistic social cost-benefit analysis for green roofs: A lifecycle approach	Økonomi	0
Kim et al.	Economic and Environmental Evaluation Model for Selecting the Optimum Design of Green Roof Systems in Elementary Schools	Økonomi	0
Peri et al.	The cost of green roofs disposal in a life cycle perspective: Covering the gap	Økonomi	0
Azis et al.	The effect of green envelope components on green building value	Økonomi	0
Langston	Green roof evaluation: A holistic 'Long life, loose fit, low energy' approach	Økonomi	0
Peng & Jim	Economic evaluation of green-roof environmental benefits in the context of climate change: The case of Hong Kong	Økonomi	0
Mahdiyar et al.	Probabilistic private cost-benefit analysis for green roof installation: A Monte Carlo simulation approach	Økonomi	0
McRae	Case study: A conservative approach to green roof benefit quantification and valuation for public buildings	Økonomi	0
Mahmoud et al.	Energy and Economic Evaluation of Green Roofs for Residential Buildings in Hot-Humid Climates	Økonomi	1
Wild et al.	Comprehending the multiple ‘values’ of green infrastructure – Valuing nature-based solutions for urban water management from multiple perspectives	Økonomi	0
